# Supplementary material for: Protein convertase subtilisin/Kexin type 9 inhibits hepatocellular carcinoma growth by interacting with GSTP1 and suppressing the JNK signaling pathway
Source: PubMed Central journal article supplement (PMC8763006; doi:10.20892/j.issn.2095-3941.2020.0313), 2022-01-15
Supplement: cbm-19-090-s001.pdf [file cbm-19-090-s001.pdf]

## Supplementary material

**Table S1** Comparison of clinicopathological profiles between hepatocellular carcinoma patients with high PCSK9 levels and those with low PCSK9 levels

| Variables              | PCSK9 level        |                    | OR    | 95% CI      | P Value |
|------------------------|--------------------|--------------------|-------|-------------|---------|
|                        | High (n = 152)     | Low (n = 83)       |       |             |         |
|                        | Number of patients | Number of patients |       |             |         |
| Age (years)            |                    |                    | 1.002 | 0.555~1.808 | 0.996   |
| ≤ 54                   | 65                 | 36                 |       |             |         |
| > 54                   | 87                 | 47                 |       |             |         |
| Gender                 |                    |                    | 1.212 | 0.524~2.802 | 0.654   |
| Female                 | 19                 | 13                 |       |             |         |
| Male                   | 133                | 70                 |       |             |         |
| Hepatitis B history    |                    |                    | 0.944 | 0.390~2.284 | 0.899   |
| Present                | 130                | 74                 |       |             |         |
| Absent                 | 22                 | 9                  |       |             |         |
| HbeAg                  |                    |                    | 0.906 | 0.490~1.673 | 0.751   |
| Positive               | 44                 | 28                 |       |             |         |
| Negative               | 108                | 55                 |       |             |         |
| Liver cirrhosis        |                    |                    | 0.454 | 0.244~0.843 | 0.012   |
| Present                | 84                 | 61                 |       |             |         |
| Absent                 | 68                 | 22                 |       |             |         |
| BCLC stage             |                    |                    | 1.318 | 0.734~2.367 | 0.355   |
| A                      | 90                 | 42                 |       |             |         |
| B/C/D                  | 62                 | 41                 |       |             |         |
| Tumor encapsulation    |                    |                    | 1.184 | 0.627~2.236 | 0.602   |
| None                   | 85                 | 45                 |       |             |         |
| Complete               | 67                 | 38                 |       |             |         |
| Microvascular invasion |                    |                    | 0.719 | 0.386~1.340 | 0.299   |
| Positive               | 59                 | 38                 |       |             |         |
| Negative               | 93                 | 45                 |       |             |         |
| Tumor differentiation  |                    |                    | 1.100 | 0.595~2.036 | 0.761   |
| I/II                   | 96                 | 50                 |       |             |         |
| III/IV                 | 56                 | 33                 |       |             |         |
| AFP level              |                    |                    | 1.350 | 0.677~2.692 | 0.394   |
| < 400 ng/mL            | 115                | 54                 |       |             |         |
| ≥ 400 ng/mL            | 37                 | 29                 |       |             |         |
| CA199 level            |                    |                    | 1.169 | 0.525~2.606 | 0.702   |
| < 37 U/mL              | 133                | 69                 |       |             |         |
| ≥ 37 U/mL              | 19                 | 14                 |       |             |         |
